# Supplementary material for: Porosity of Rigid Dendrimers in Bulk: Interdendrimer Interactions and Functionality as Key Factors
Source: MDPI journal article supplement (doi:10.3390/nano11102600), 2021-10-02
Supplement: s1 [file s1]

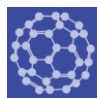

## Supplementary Material

# Porosity of Rigid Dendrimers in Bulk: Interdendrimer Interactions and Functionality as Key Factors

Olga Serenko <sup>1,\*</sup>, Kirill Skupov <sup>1</sup>, Artem Bakirov <sup>2</sup>, Nina Kuchkina <sup>1</sup>, Zinaida Shifrina <sup>1</sup> and Aziz Muzafarov <sup>1</sup>

<sup>1</sup> A.N. Nesmeyanov Institute of Organoelement Compounds of Russian Academy of Sciences, 28 Vavilova St., GSP-1, V-334, 119991 Moscow, Russia; kskupov@gmail.com (K.S.); kuchkina@ineos.ac.ru (N.K.); z\_shifrina@yahoo.com (Z.S.); aziz@ineos.ac.ru (A.M.)

<sup>2</sup> N.S. Enikolopov Institute of Synthetic Polymeric Materials, Russian Academy of Sciences, 117393 Moscow, Russia; bakirov.artem@gmail.com

\* Correspondence: oserenko@yandex.ru

**Citation:** Serenko, O.; Skupov, K.; Bakirov, A.; Kuchkina, N.; Shifrina, Z.; Muzafarov, A. Porosity of Rigid Dendrimers in Bulk: Interdendrimer Interactions and Functionality as Key Factors. *Nanomaterials* **2021**, *11*, 2600. <https://doi.org/10.3390/nano11102600>

Academic Editor: Jørn B. Christensen

Received: 13 September 2021

Accepted: 30 September 2021

Published: 2 October 2021

**Publisher's Note:** MDPI stays neutral with regard to jurisdictional claims in published maps and institutional affiliations.

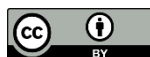

**Copyright:** © 2021 by the authors. Licensee MDPI, Basel, Switzerland. This article is an open access article distributed under the terms and conditions of the Creative Commons Attribution (CC BY) license (<https://creativecommons.org/licenses/by/4.0/>).

When using argon as an adsorbate gas the value of the surface area was calculated according to the BET theory using the Temkin equation for the capacity of monolayer:

$$V_m = V(1 - p/p_s)(1 + \frac{p_s/p - 1}{C}) \quad (1)$$

where  $V_m$  is the capacity of monolayer,  $\text{cm}^3/\text{g}$ ;  $V$  is the value of adsorption corresponding to the given relative pressure  $p/p_s$ ,  $\text{cm}^3/\text{g}$ ;  $p$  is the equilibrium pressure of argon, mm Hg;  $p_s$  is the pressure of argon saturated vapor at  $T = -196^\circ\text{C}$  and  $p_s = 240$  mm Hg; and  $C$  is the BET constant depending on the energy of adsorption and temperature (in calculations the value of  $C$  was taken to be 60) [41]. The apparent BET surface area was calculated according to the equation:

$$S = 4.17V_m \quad (2)$$

where 4.17 is the area occupied by 1 mL of argon poured as a monomolecular layer.

**Table S1.** Skeletal density of dendrimers ( $\rho_s$ ).

| Dendrimer | $\rho_s, \text{g/cm}^3$ |
|-----------|-------------------------|
| G2-PhPh   | 0.879                   |
| G2-PyPy   | 0.942                   |
| G3-PyPyPh | 1.123                   |
| G3-PyPyPy | 1.286                   |

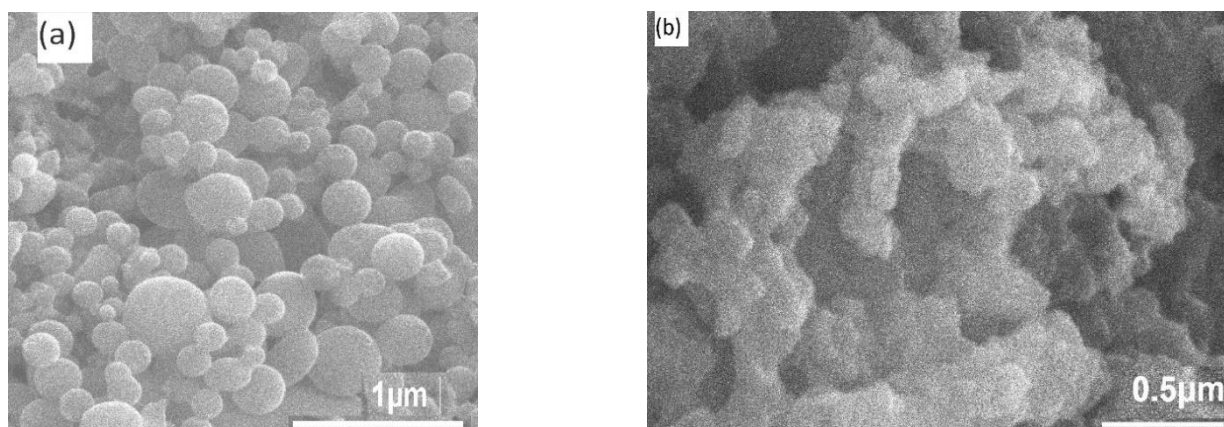

**Figure S1.** Surface morphology of dendrimer powders: G2-PyPy (a), and G3-PyPyPy (b).

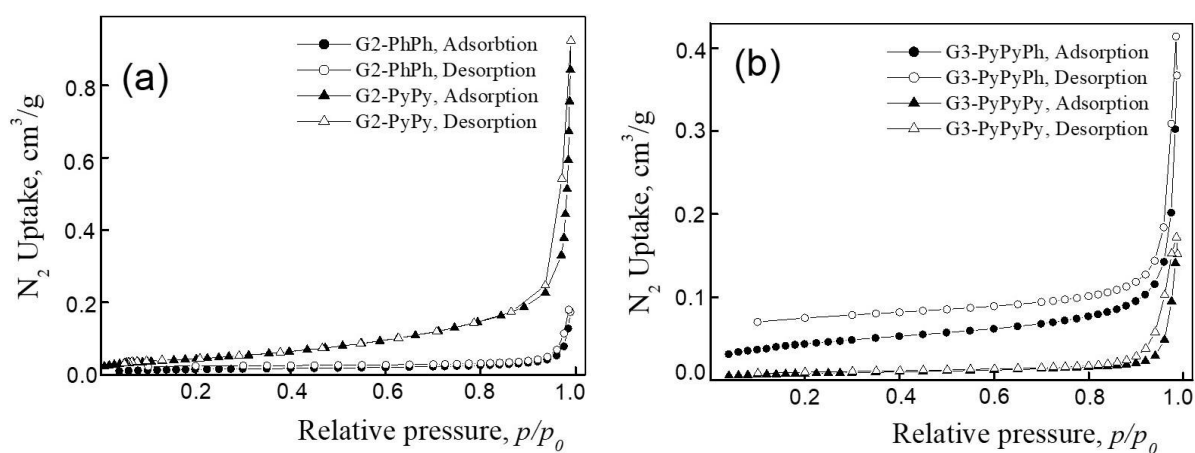

**Figure S2.**  $N_2$  adsorption–desorption isotherms on dendrimers of second (a), and third (b) generations.

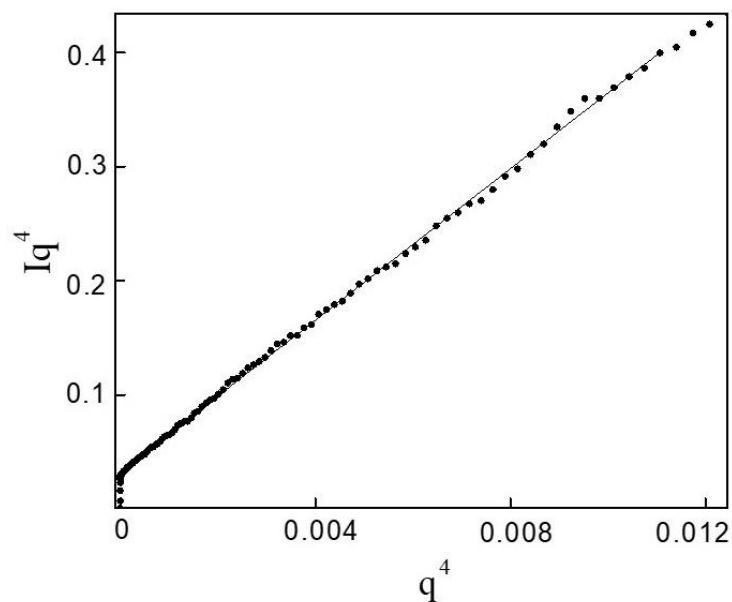

**Figure S3.** SAXS curve for G3-PyPyPy in Porod coordinates. The Porod constant is defined as the point of intersection of the ordinate axis with the linear approximation of the wide-angle region of the SAXS curve.
